# Supplementary material for: Efficient tuning of the conversion from ISC to high-level RISC via adjusting the triplet energies of charge-transporting layers in rubrene-doped OLEDs
Source: Royal Society of Chemistry journal article supplement (doi:10.1039/d0tc05898j), 2021-01-01
Supplement: d0tc05898j1.pdf [file d0tc05898j1.pdf]

## Supplementary Information

Efficient tuning of the conversion from ISC to high-level RISC via  
adjusting the triplet energies of charge-transporting layers in  
rubrene-doped OLEDs

*Xiantong Tang,<sup>a</sup> Xi Zhao,<sup>a</sup> Hongqiang Zhu,<sup>b</sup> Linyao Tu,<sup>a</sup> Caihong Ma,<sup>a</sup> Ying Wang,<sup>a</sup> Shengnan  
Ye,<sup>a</sup> and Zuhong Xiong<sup>\*a</sup>*

*<sup>a</sup>School of Physical Science and Technology, MOE Key Laboratory on Luminescence and  
Real-Time Analysis, Southwest University, Chongqing 400715, China*

*<sup>b</sup>Chongqing Key Laboratory of Photo-Electric Functional Materials, Chongqing Normal  
University, Chongqing 401331, China*

**Corresponding Author:**

zhxiong@swu.edu.cn

**Table S1.** Energy levels of the materials used in the main article.

| Abbreviation     | HOMO [eV] | LUMO [eV] | Ref. |
|------------------|-----------|-----------|------|
| <i>m</i> -MTDATA | -5.1      | -2.0      | [1]  |
| TCTA             | -5.2      | -1.7      | [2]  |
| NPB              | -5.4      | -2.4      | [3]  |
| CBP              | -6.0      | -2.3      | [4]  |
| Rubrene          | -5.4      | -3.2      | [5]  |
| Alq <sub>3</sub> | -5.6      | -3.0      | [6]  |
| BCP              | -6.4      | -2.9      | [7]  |
| PO-T2T           | -7.5      | -3.5      | [8]  |

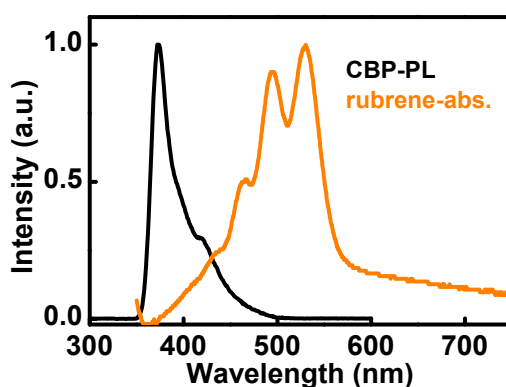

**Figure S1** Photoluminescence spectrum of CBP film and absorption spectrum of rubrene film at room temperature.

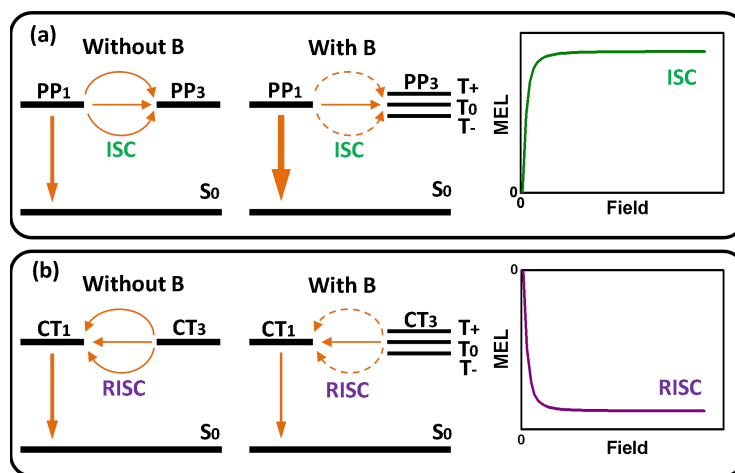

**Figure S2** (a) Schematic diagrams of the ISC process from singlet (PP<sub>1</sub>) to triplet polaron pairs (PP<sub>3</sub>) states in absence and presence of an external magnetic field and ISC-determined MEL fingerprint curve. (b) Schematic diagrams of the RISC process from triplet (CT<sub>3</sub>) to singlet charge-transfer (CT<sub>1</sub>) states without and with magnetic field and RISC-induced MEL fingerprint curve.

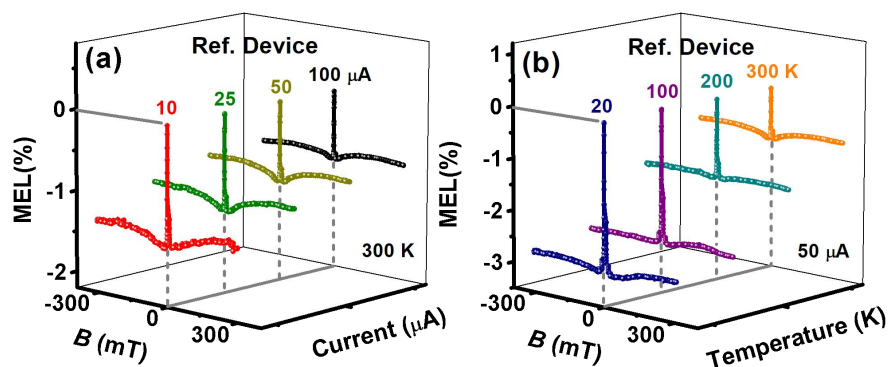

**Figure S3** (a) The current dependence of MEL responses in reference device at 300 K. (b) Temperature-dependent MEL responses of reference device at a fixed bias current of 50  $\mu\text{A}$ .

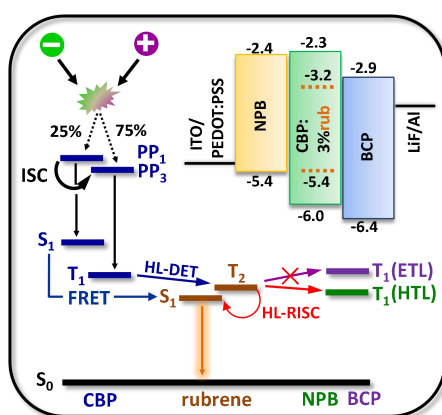

**Figure S4** Schematic diagram of microscopic mechanisms in Device 2 and its energy level structure.

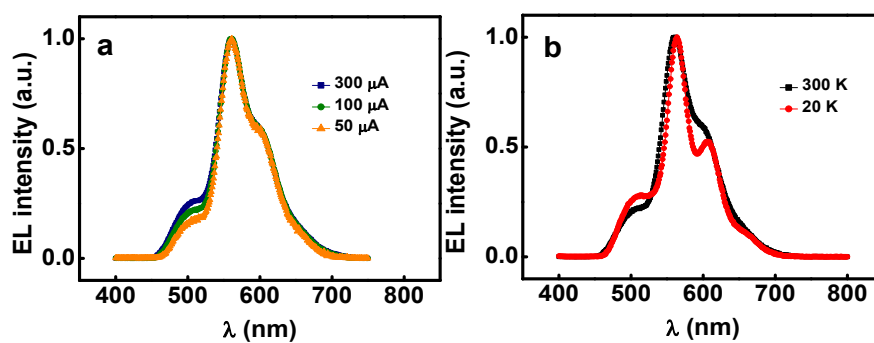

**Figure S5** (a) Temperature-dependent normalized EL spectra for Device 4 at a bias current of 100  $\mu\text{A}$ . (b) Current-dependent EL spectra for Device 4 at 300 K.

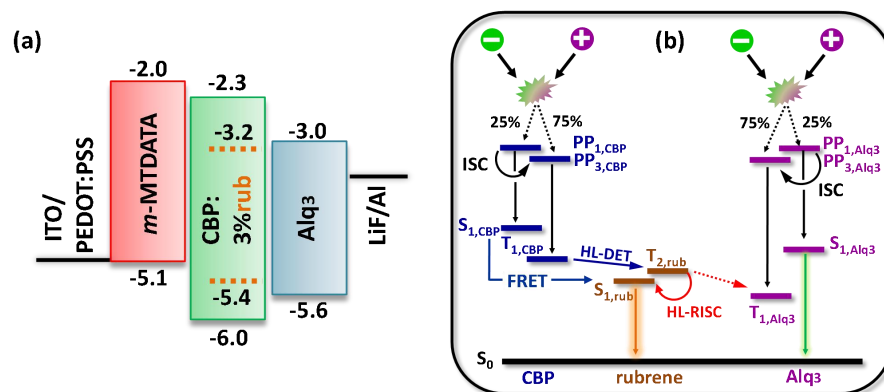

**Figure S6** (a) Energy level alignment of Device 4. (b) Schematic diagram of microscopic mechanisms in Device 4.

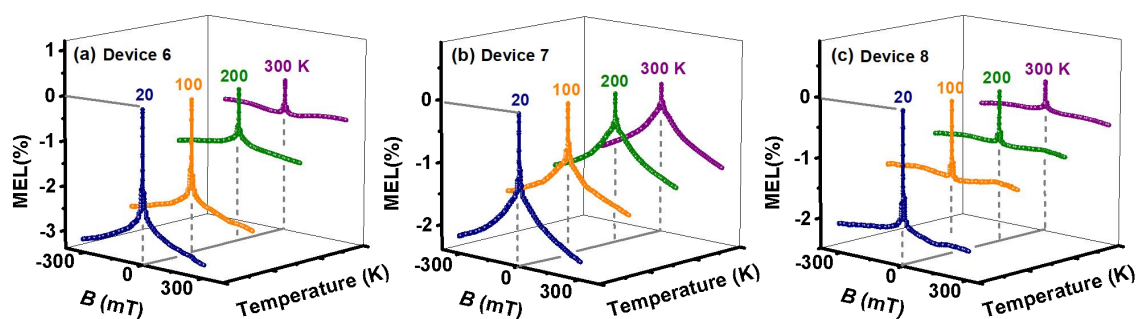

**Figure S7** Temperature-dependent MEL responses of (a) Device 6, (b) Device 7, and (c) Device 8.

## References

- 1 N. T. Tierce, C. H. Chen, T. L. Chiu, C. F. Lin, C. J. Bardeen, and J. H. Lee, *Phys. Chem. Chem. Phys.*, 2018, **20**, 27449–27455.
- 2 J. S. Swensen, E. Polikarpov, A. V. Ruden, L. Wang, L. S. Sapochak, and A. B. Padmaperuma, *Adv. Funct. Mater.*, 2011, **21**, 3250–3258.
- 3 Q. M. Peng, W. J. Li, S. T. Zhang, P. Chen, F. Li, and Y. G. Ma, *Adv. Opt. Mater.*, 2013, **1**, 362–366.
- 4 J. Q. Deng, W. Y. Jia, Y. B. Chen, D. Y. Liu, Y. Q. Hu, and Z. H. Xiong, *Sci. Rep.*, 2017, **7**, 44396.
- 5 D. W. Di, L. Yang, J. M. Richter, L. Meraldi, R. M. Altamimi, A. Y. Alyamani, D. Credgington, K. P. Musselman, J. L. MacManus-Driscoll, and R. H. Friend, *Adv. Mater.*, 2017, **29**, 1605987.
- 6 Q. M. Peng, N. Gao, W. J. Li, P. Chen, F. Li, and Y. G. Ma, *Appl. Phys. Lett.*, 2013, **102**, 193304.
- 7 G. R. Fu, L. Liu, W. T. Li, Y. N. He, T. Z. Miao, X. Q. Lü, and H. S. He, *Adv. Opt. Mater.*, 2019, **7**, 1900776.
- 8 J. H. Lee, S. H. Cheng, S. J. Yoo, H. Shin, J. H. Chang, C. I. Wu, K. T. Wong, and J. J. Kim, *Adv. Funct. Mater.*, 2015, **25**, 361–366.
